# Supplementary material for: Using Electroporation to Improve and Accelerate Zebrafish Embryo Toxicity Testing
Source: MDPI journal article supplement (doi:10.3390/mi15010049), 2023-12-26
Supplement: s1 [file s1]

Supplementary Figures :

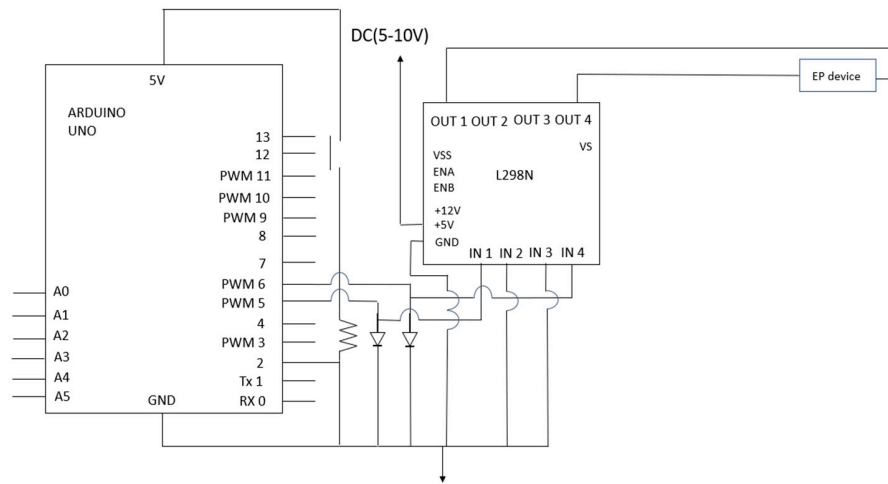

(a)

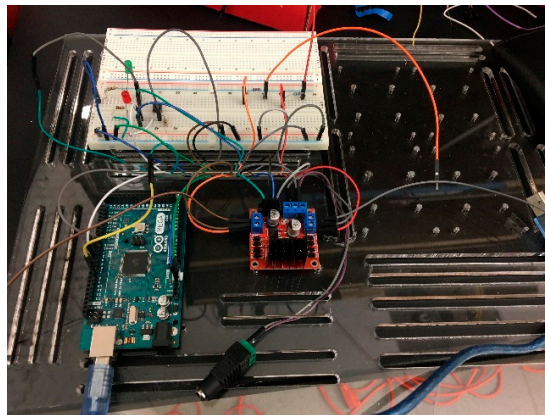

(b)

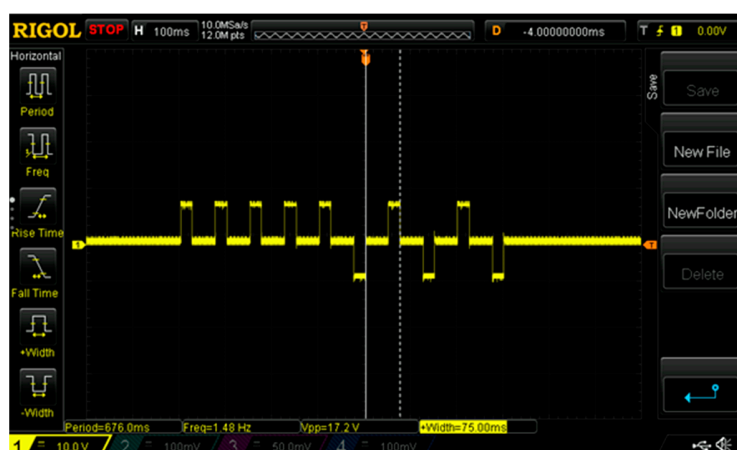

(c)

Supplementary Figure S1: (a) Electroporation controller schematic circuit diagram for voltage 5-25V (b) actual circuit (c) applied pulses

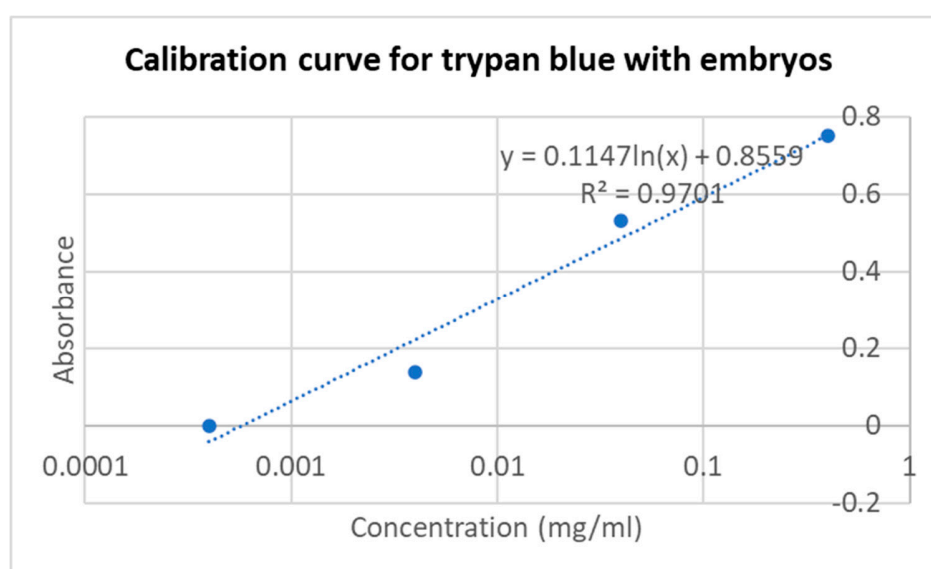

Supplementary Figure S2 : Calibration curve for trypan blue when embryos are soaked in various concentration of trypan blue for 5 hours. After that images are taken and RGB values are calculated to determine absorbance.

| Ordered Differences Report |         |            |             |          |          |         |
|----------------------------|---------|------------|-------------|----------|----------|---------|
| Level                      | - Level | Difference | Std Err Dif | Lower CL | Upper CL | p-Value |
| 20V                        | No elec | 4.827555   | 0.3308247   | 4.11285  | 5.542259 | <.0001* |
| 20V                        | 5V      | 3.287706   | 0.3424361   | 2.54792  | 4.027495 | <.0001* |
| 20V                        | 10V     | 3.187565   | 0.3308247   | 2.47286  | 3.902268 | <.0001* |
| 15V                        | No elec | 3.121162   | 0.3308247   | 2.40646  | 3.835866 | <.0001* |
| 20V                        | 15V     | 1.706393   | 0.3954112   | 0.85216  | 2.560627 | 0.0008* |
| 10V                        | No elec | 1.639990   | 0.2500800   | 1.09973  | 2.180255 | <.0001* |
| 15V                        | 5V      | 1.581313   | 0.3424361   | 0.84153  | 2.321102 | 0.0005* |
| 5V                         | No elec | 1.539849   | 0.2652499   | 0.96681  | 2.112886 | <.0001* |
| 15V                        | 10V     | 1.481172   | 0.3308247   | 0.76647  | 2.195875 | 0.0006* |
| 10V                        | 5V      | 0.100142   | 0.2652499   | -0.47290 | 0.673179 | 0.7119  |

(a)

| Ordered Differences Report |         |            |             |           |           |         |
|----------------------------|---------|------------|-------------|-----------|-----------|---------|
| Level                      | - Level | Difference | Std Err Dif | Lower CL  | Upper CL  | p-Value |
| 20V                        | No elec | 0.2122619  | 0.0145987   | 0.180723  | 0.2438005 | <.0001* |
| 15V                        | No elec | 0.1693751  | 0.0145987   | 0.137837  | 0.2009136 | <.0001* |
| 10V                        | No elec | 0.1194420  | 0.0110356   | 0.095601  | 0.1432829 | <.0001* |
| 5V                         | No elec | 0.1147348  | 0.0117050   | 0.089448  | 0.1400219 | <.0001* |
| 20V                        | 5V      | 0.0975271  | 0.0151111   | 0.064882  | 0.1301726 | <.0001* |
| 20V                        | 10V     | 0.0928199  | 0.0145987   | 0.061281  | 0.1243585 | <.0001* |
| 15V                        | 5V      | 0.0546403  | 0.0151111   | 0.021995  | 0.0872857 | 0.0031* |
| 15V                        | 10V     | 0.0499331  | 0.0145987   | 0.018395  | 0.0814716 | 0.0046* |
| 20V                        | 15V     | 0.0428869  | 0.0174488   | 0.005191  | 0.0805826 | 0.0288* |
| 10V                        | 5V      | 0.0047072  | 0.0117050   | -0.020580 | 0.0299943 | 0.6941  |

(b)

Supplementary Figure S3 : T test for trypan blue experiments (a) Concentration (b) Absorbance

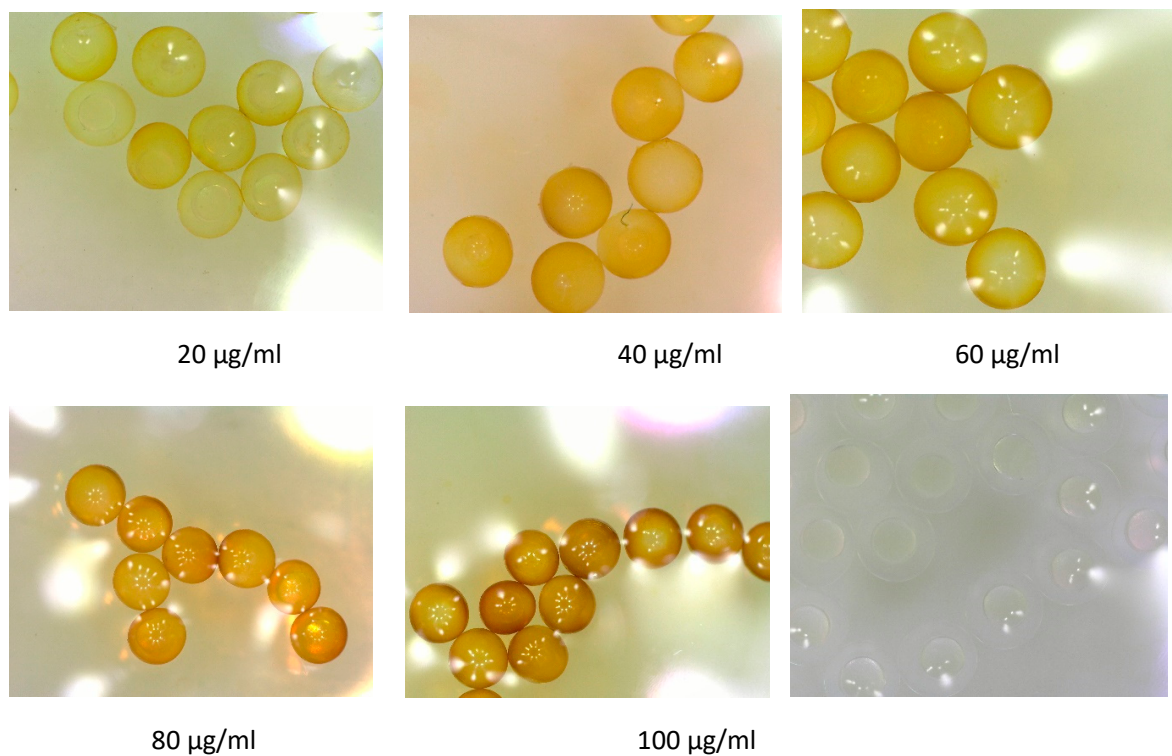

Supplementary Figure S4 : Silver concentration inside chorion after exposure of 5 hours for control experiment

Supplementary Table :

Supplementary Table S1 : Average absorbance for various concentration of trypan blue entered in to the chorion of embryos.

| Trypan blue (mg/ml) | Average absorbance |
|---------------------|--------------------|
| 0                   | 0                  |
| 0.0004              | 0.0001             |
| 0.004               | 0.138              |
| 0.04                | 0.53               |
| 0.4                 | 0.75               |

Supplementary Table S2 : Trypan blue concentration and absorbance for various voltage application

| Voltage | Concentration (µg/ml) | SD (concentration) | Absorbance | SD (absorbance) |
|---------|-----------------------|--------------------|------------|-----------------|
| Control | 0.913                 | 0.188              | 0.051      | 0.023           |
| 5V      | 2.353                 | 0.186              | 0.166      | 0.009           |

|     |       |       |       |       |
|-----|-------|-------|-------|-------|
| 10V | 2.753 | 0.220 | 0.181 | 0.010 |
| 15V | 4.034 | 0.262 | 0.221 | 0.036 |
| 20V | 5.741 | 0.038 | 0.264 | 0.001 |

Supplementary Table S3 : Survival rate for trypan blue testing

| Voltage | No of embryos | survived | ratio | Normalized percentage |
|---------|---------------|----------|-------|-----------------------|
| Control | 30            | 20       | 0.67  | 100                   |
| 5V      | 28            | 19       | 0.68  | 100                   |
| 10V     | 29            | 17       | 0.59  | 87.49                 |
| 15V     | 23            | 8        | 0.35  | 51.91                 |
| 20V     | 20            | 5        | 0.25  | 37.31                 |

Supplementary Table S4 : absorbance calculation for silver and gold nanoparticles.

| Sample         | Average absorbance | SD    | P-value |
|----------------|--------------------|-------|---------|
| only AgNP      | 0.012              | 0.002 |         |
| Voltage+ AgNP  | 0.042              | 0.008 | 0.0017  |
| Only AuNP      | 0.031              | 0.001 |         |
| Voltage + AuNP | 0.041              | 0.004 | 0.0059  |

Supplementary Table S5 : Control experiments results

| Concentration( $\mu$ g/ml) | Absorbance | STD   |
|----------------------------|------------|-------|
| 20                         | 0.16       | 0.056 |
| 40                         | 0.24       | 0.04  |
| 60                         | 0.28       | 0.058 |
| 80                         | 0.31       | 0.039 |
| 100                        | 0.37       | 0.043 |

Supplementary Table S6 : Control experiment results

| Concentration | Survival percentage | Deformation rate |
|---------------|---------------------|------------------|
| Control 1     | 88.23               | 0                |
| 100ug/ml      | 25                  | 80               |
| 80ug/ml       | 30                  | 75               |
| 60ug/ml       | 37.5                | 33.33            |
| 40ug/ml       | 50                  | 10               |
| 20ug/ml       | 67.5                | 0                |

Supplementary Table S7: No of embryos for different repetition

|          | Control | only nano | only v | Nano+V |
|----------|---------|-----------|--------|--------|
| Repeat 1 | n=44    | n =44     | n=25   | n=25   |
| Repeat 2 | n=50    | n=21      | n=33   | n=30   |
| Repeat 3 | n=50    | n=36      | n=35   | n=25   |
| Repeat 4 | n=53    | n=20      | n=28   | n=25   |
| Repeat 5 | n=51    | n=34      | n=33   | n=25   |

Supplementary Table S8 : Deformation rate for electroporation experiments

|                              | Day 1 | Day 2 | Day 3 | Day 4 | Day 5 |
|------------------------------|-------|-------|-------|-------|-------|
| Control 1(No V+ No particle) | 0     | 0     | 0     | 0     | 0     |
| Only nano                    | 0     | 0     | 20    | 0     | 0     |
| Only V                       | 0     | 0     | 0     | 0     | 3.7   |
| Nano+V                       | 35.71 | 31.5  | 50    | 22    | 22    |

Supplementary Table S9: Student t-test for Deformity rate for electroporation experiments

| Condition                    | Average Deformity rate (%) | SD    | P-value |
|------------------------------|----------------------------|-------|---------|
| Control 1(No V+ No particle) | 0.00                       | 0.00  | -       |
| Only nano                    | 4.00                       | 8.94  | 0.187   |
| Only V                       | 0.74                       | 1.65  | 0.187   |
| Nano+V                       | 32.24                      | 11.59 | 0       |

Supplementary Table S10 : Heart rate data for electroporation experiments

|                              | Repeat 1(Avg) | Repeat 2(Avg) | Repeat 3(Avg) | Repeat 4(Avg) | Repeat 5(Avg) |
|------------------------------|---------------|---------------|---------------|---------------|---------------|
| Control 1(No V+ NO particle) | 107           | 90            | 98            | 109           | 111           |
| Only nano                    | 112           | 96            | 90            | 98            | 93            |
| Only V                       | 91            | 85            | 102           | 94            | 107           |
| Nano+V                       | 98            | 77            | 76            | 74            | 100           |

Supplementary Table S11: P-value for students-t test for heart rate data for electroporation experiment

| Condition | Repeat 1 | Repeat 2 | Repeat 3 | Repeat 4 | Repeat 5 |
|-----------|----------|----------|----------|----------|----------|
|-----------|----------|----------|----------|----------|----------|

|                              |        |       |      |       |       |
|------------------------------|--------|-------|------|-------|-------|
| Control 1(No V+ NO particle) | -      | -     | -    | -     | -     |
| Only nano                    | 0.2    | 0.34  | 0.36 | 0.47  | 0.3   |
| Only V                       | 0.16   | 0.34  | 0.6  | 0.92  | 0.17  |
| Nano+V                       | 0.0008 | 0.016 | 0.14 | 0.012 | 0.012 |

Supplementary Table S12: Survival data for electroporation experiments

|                              | Day 1 | Day 2 | Day 3 | Day 4 | Day 5 |
|------------------------------|-------|-------|-------|-------|-------|
| Control 1(No V+ NO particle) | 54.83 | 72    | 70    | 50.9  | 75    |
| Only nano                    | 52.27 | 71    | 66.67 | 50    | 56    |
| Only V                       | 40    | 84.8  | 71.42 | 53.5  | 82    |
| Nano+V                       | 56    | 70    | 20    | 36    | 77    |
